# Supplementary material for: Telomere Length Affects the Frequency and Mechanism of Antigenic Variation in Trypanosoma brucei
Source: PubMed Central journal article supplement (PMC3431348; doi:10.1371/journal.ppat.1002900), 2012-08-30
Supplement: ppat.1002900.s005.pdf [file ppat.1002900.s005.pdf]

| Short<br>Telomere<br>Switchers | Switch<br>Mechanism | BSD (S/R) | 221 (+/-) | BSD (+/-) | PSD (+/-) |
|--------------------------------|---------------------|-----------|-----------|-----------|-----------|
| 1A-A5                          | GC                  | R         | -         | +         | +         |
| 1A-A7                          | UD                  | S         | -         | +         | ND        |
| 1A-A8                          | GC                  | R         | -         | +         | -         |
| 1A-A9                          | GC                  | R         | -         | +         | -         |
| 1A-B10                         | GC                  | R         | -         | +         | -         |
| 1A-B11                         | GC                  | R         | -         | +         | -         |
| 1A-B3                          | GC                  | R         | -         | +         | -         |
| 1A-B4                          | GC                  | R         | -         | +         | +         |
| 1A-B5                          | GC                  | R         | -         | +         | -         |
| 1A-B7                          | IS                  | S         | +         | +         | ND        |
| 1A-C11                         | GC                  | R         | -         | +         | -         |
| 1A-C12                         | GC                  | R         | -         | +         | -         |
| 1A-C2                          | GC                  | R         | -         | +         | -         |
| 1A-C4                          | GC                  | R         | -         | +         | -         |
| 1A-D11                         | GC                  | R         | -         | +         | -         |
| 1A-D3                          | GC                  | R         | -         | +         | -         |
| 1A-D4                          | GC                  | R         | -         | +         | -         |
| 1A-D5                          | GC                  | R         | -         | +         | -         |
| 1A-D6                          | GC                  | R         | -         | +         | -         |
| 1A-D7                          | GC                  | R         | -         | +         | +         |
| 1A-D8                          | GC                  | R         | -         | +         | -         |
| 1A-E12                         | GC                  | R         | -         | +         | +         |
| 1A-E2                          | GC                  | R         | -         | +         | -         |
| 1A-E3                          | GC                  | R         | -         | +         | -         |
| 1A-E7                          | GC                  | R         | -         | +         | -         |
| 1A-F10                         | GC                  | R         | -         | +         | -         |
| 1A-F12                         | GC                  | R         | -         | +         | -         |
| 1A-F3                          | GC                  | R         | -         | +         | +         |
| 1A-F4                          | GC                  | R         | -         | +         | -         |
| 1A-F5                          | GC                  | R         | -         | +         | -         |
| 1A-F6                          | GC                  | R         | -         | +         | -         |
| 1A-F7                          | GC                  | R         | -         | +         | -         |
| 1A-F8                          | GC                  | R         | -         | +         | -         |
| 1A-F9                          | GC                  | R         | -         | +         | -         |
| 1A-G11                         | GC                  | R         | -         | +         | -         |
| 1A-G2                          | GC                  | R         | -         | +         | -         |
| 1A-G3                          | GC                  | R         | -         | +         | -         |
| 1A-G5                          | GC                  | R         | -         | +         | -         |
| 1A-G8                          | GC                  | R         | -         | +         | -         |
| 1A-H10                         | GC                  | R         | -         | +         | -         |

|        |       |   |   |   |    |
|--------|-------|---|---|---|----|
| 1A-H11 | GC    | R | - | + | -  |
| 1A-H3  | GC    | R | - | + | -  |
| 1A-H4  | GC    | R | - | + | +  |
| 1A-H5  | GC    | R | - | + | -  |
| 1A-H7  | GC    | R | - | + | -  |
| 1B-A3  | GC    | R | - | + | -  |
| 1B-A4  | GC    | R | - | + | +  |
| 1B-D9  | GC    | R | - | + | -  |
| 1B-E1  | GC    | R | - | + | -  |
| 1B-F3  | GC    | R | - | + | -  |
| 3A-A5  | TE    | R | + | + | ND |
| 3A-A8  | GC    | R | - | + | -  |
| 3A-B8  | GC    | R | - | + | -  |
| 3A-C10 | GC    | R | - | + | -  |
| 3A-C11 | GC    | R | - | + | -  |
| 3A-D1  | IS    | S | + | + | ND |
| 3A-D10 | GC    | R | - | + | -  |
| 3A-D2  | GC    | R | - | + | -  |
| 3A-D9  | GC    | R | - | + | -  |
| 3A-E11 | GC    | R | - | + | -  |
| 3A-E6  | GC    | R | - | + | -  |
| 3A-G6  | GC    | R | - | + | -  |
| 3B-F6  | GC    | R | - | + | -  |
| 3B-H3  | GC    | R | - | + | -  |
| 3B-H9  | GC    | R | - | + | -  |
| 3C-D2  | UD    | S | - | + | ND |
| 4A-B10 | GC    | R | - | + | -  |
| 4A-B11 | ES GC | S | - | - | -  |
| 4A-B6  | IS    | S | + | + | ND |
| 4A-C9  | UD    | S | - | + | ND |
| 4A-D7  | UD    | S | - | + | ND |
| 4A-D8  | GC    | R | - | + | -  |
| 4A-E7  | GC    | R | - | + | -  |
| 4A-F10 | UD    | S | - | + | ND |
| 4A-F8  | IS    | S | + | + | ND |
| 4A-G12 | IS    | S | + | + | ND |
| 4A-G3  | IS    | S | + | + | ND |
| 4A-G5  | GC    | R | - | + | +  |
| 4A-G8  | GC    | R | - | + | -  |
| 4A-H8  | UD    | S | - | + | ND |
| 4B-H5  | GC    | R | - | + | +  |
| 5A-A11 | GC    | R | - | + | -  |
| 5A-A12 | GC    | R | - | + | -  |

|        |    |   |   |   |   |
|--------|----|---|---|---|---|
| 5A-A2  | GC | R | - | + | - |
| 5A-A4  | GC | R | - | + | - |
| 5A-A6  | GC | R | - | + | - |
| 5A-A7  | GC | R | - | + | - |
| 5A-A8  | GC | R | - | + | - |
| 5A-A9  | GC | R | - | + | - |
| 5A-B1  | GC | R | - | + | - |
| 5A-B10 | GC | R | - | + | - |
| 5A-B11 | GC | R | - | + | - |
| 5A-B12 | GC | R | - | + | - |
| 5A-B2  | GC | R | - | + | - |
| 5A-B4  | GC | R | - | + | - |
| 5A-B5  | GC | R | - | + | - |
| 5A-B7  | GC | R | - | + | - |
| 5A-B9  | GC | R | - | + | - |
| 5A-C1  | GC | R | - | + | - |
| 5A-C10 | GC | R | - | + | - |
| 5A-C11 | GC | R | - | + | - |
| 5A-C12 | GC | R | - | + | - |
| 5A-C2  | GC | R | - | + | - |
| 5A-C3  | GC | R | - | + | - |
| 5A-C6  | GC | R | - | + | - |
| 5A-C8  | GC | R | - | + | - |
| 5A-D1  | GC | R | - | + | - |
| 5A-D11 | GC | R | - | + | - |
| 5A-D12 | GC | R | - | + | - |
| 5A-D2  | GC | R | - | + | - |
| 5A-D4  | GC | R | - | + | - |
| 5A-D6  | GC | R | - | + | - |
| 5A-D8  | GC | R | - | + | - |
| 5A-D9  | GC | R | - | + | - |
| 5A-E1  | GC | R | - | + | - |
| 5A-E2  | GC | R | - | + | - |
| 5A-E3  | GC | R | - | + | - |
| 5A-E4  | GC | R | - | + | - |
| 5A-E5  | GC | R | - | + | - |
| 5A-E6  | GC | R | - | + | - |
| 5A-E7  | GC | R | - | + | - |
| 5A-E8  | GC | R | - | + | - |
| 5A-F1  | GC | R | - | + | - |
| 5A-F10 | GC | R | - | + | - |
| 5A-F11 | GC | R | - | + | - |
| 5A-F12 | GC | R | - | + | - |

|        |       |   |   |   |    |
|--------|-------|---|---|---|----|
| 5A-F2  | GC    | R | - | + | -  |
| 5A-F3  | GC    | R | - | + | -  |
| 5A-F4  | GC    | R | - | + | -  |
| 5A-F5  | GC    | R | - | + | -  |
| 5A-F6  | GC    | R | - | + | -  |
| 5A-F7  | GC    | R | - | + | -  |
| 5A-F8  | GC    | R | - | + | -  |
| 5A-F9  | GC    | R | - | + | -  |
| 5A-G1  | GC    | R | - | + | -  |
| 5A-G10 | GC    | R | - | + | -  |
| 5A-G11 | GC    | R | - | + | -  |
| 5A-G12 | GC    | R | - | + | -  |
| 5A-G2  | GC    | R | - | + | -  |
| 5A-G3  | GC    | R | - | + | -  |
| 5A-G4  | GC    | R | - | + | -  |
| 5A-G5  | GC    | R | - | + | -  |
| 5A-G6  | GC    | R | - | + | -  |
| 5A-G8  | GC    | R | - | + | -  |
| 5A-G9  | GC    | R | - | + | -  |
| 5A-H10 | GC    | R | - | + | -  |
| 5A-H2  | GC    | R | - | + | -  |
| 5A-H3  | GC    | R | - | + | -  |
| 5A-H5  | GC    | R | - | + | -  |
| 5A-H6  | GC    | R | - | + | -  |
| 5A-H7  | GC    | R | - | + | -  |
| 5A-H8  | GC    | R | - | + | -  |
| 5B-A2  | GC    | R | - | + | -  |
| 5B-A3  | GC    | R | - | + | -  |
| 5B-B7  | GC    | R | - | + | -  |
| 5B-C2  | GC    | R | - | + | -  |
| 5B-C6  | GC    | R | - | + | -  |
| 5B-D10 | GC    | R | - | + | -  |
| 5B-D6  | GC    | R | - | + | -  |
| 5B-E6  | GC    | R | - | + | -  |
| 5B-F6  | UD    | S | - | + | ND |
| 5B-G5  | GC    | R | - | + | -  |
| 5B-H12 | GC    | R | - | + | -  |
| 5C-A5  | GC    | R | - | + | -  |
| 5C-F12 | GC    | R | - | + | -  |
| 5C-F4  | GC    | R | - | + | -  |
| 5C-G11 | GC    | R | - | + | -  |
| 7A-A12 | ES GC | S | - | - | -  |
| 7A-A4  | IS    | S | + | + | ND |

|        |       |   |   |   |    |
|--------|-------|---|---|---|----|
| 7A-A8  | IS    | S | + | + | ND |
| 7A-B6  | IS    | S | + | + | ND |
| 7A-B7  | GC    | R | - | + | +  |
| 7A-B9  | GC    | R | - | + | +  |
| 7A-D12 | TE    | R | + | + | ND |
| 7A-D7  | GC    | R | - | + | +  |
| 7A-E12 | GC    | R | - | + | +  |
| 7A-E2  | ES GC | S | - | - | -  |
| 7A-F10 | IS    | S | + | + | ND |
| 7A-F12 | GC    | R | - | + | +  |
| 7A-F4  | GC    | R | - | + | +  |
| 7A-H11 | GC    | R | - | + | +  |
| 7A-H3  | GC    | R | - | + | +  |
| 7A-H5  | IS    | S | + | + | ND |
| 7B-A7  | IS    | S | + | + | ND |
| 7B-D7  | GC    | R | - | + | -  |
| 7B-H7  | GC    | R | - | + | -  |
| 8A-C10 | GC    | R | - | + | -  |
| 8A-D8  | IS    | S | + | + | +  |

**KEY**

|        |                             |
|--------|-----------------------------|
| 221=   | VSG427-2                    |
| BSD=   | Blasticidin                 |
| PSD=   | Pseudogene                  |
| R=     | Resistant                   |
| S=     | Sensitive                   |
| +=     | Present in Genome           |
| -=     | Absent from Genome          |
| GC=    | Duplicative Gene Conversion |
| IS=    | In Situ/Transcriptional     |
| TE=    | Telomere Exchange           |
| ES GC= | Expression Site GC          |
| UD=    | Undetermined                |
